# Supplementary material
Source: PubMed Central journal article supplement (PMC3219102)
Supplement: 1103764108_pnas.201103764SI.pdf [file 1103764108_pnas.201103764SI.pdf]

# Supporting Information

Boeras et al. 10.1073/pnas.1103764108

## SI Methods

Using the Test of Random Transmission analysis, given  $n = 8$  transmission pairs, we address the question of whether or not the transmitted sequence is randomly distributed between rakes and nonrakes. All sequences were sampled from the GT. We pick a distance threshold,  $D$ , and define a cluster as any subset of sequences within distance  $D$  from one another. In other words, any two sequences  $s_1$  and  $s_2$  are within the same cluster if they differ by less than the distance  $D$ . We compute raw pairwise distances from all available sequences from any given donor and then assign sequences to clusters using the `cluster.dist` procedure in R.

For any given  $D$ , and for each transmission pair  $i = 1, \dots, N$ , we calculate the proportion,  $p_i$ , of sequences outside a cluster. Let  $P_D(n)$  be the probability that  $n$  donors transmit a sequence outside a cluster. Then,

$$P_D(0) = \prod_{i=1}^N (1-p_i)$$
$$P_D(1) = \sum_{j=1}^N \prod_{i \neq j} p_i (1-p_i) = P_D(0) \sum_{i=1}^N \frac{p_i}{1-p_i}$$

and so on. Let  $g_D$  be the probability generating function defined by

$$g_D(x) = \sum_{i=1}^N P_D(i)x^i.$$

One can see that

$$g_D(x) = \prod_{i=1}^N [(1-p_i) + p_i x].$$

We can thus calculate  $P_D(n)$  using the formula

$$P_D(n) = \frac{1}{n!} \frac{d^n}{dx^n} [g_D(x)]|_{x=0}$$

and Mathematica to compute  $P_D(n)$  for  $n = 1, \dots, 9$  and  $D = 1, \dots, 10$  according to the above formula.

For each  $D$ , we call  $n_{obs}$  the number of donors that transmitted sequences outside a cluster and compute

$$p(D) = \sum_{n=n_{obs}}^N P_D(n).$$

The quantity  $p(D)$  is the overall probability across eight donors that the observed number of sequences transmitted outside a cluster (i.e., not in a rake) is significantly different from what we would observe if transmission were equally likely among all sequences.





**Table S2. Nucleotide differences between donor and recipient sequences**

|          | D BL | D GT | BL source | GT source |
|----------|------|------|-----------|-----------|
| F-DONORS |      |      |           |           |
| RW36     | 10   | 10   | PL        | CA        |
| ZM201    | 5    | 6    | PL        | SW        |
| ZM216    | 4    | 3    | PL        | SW        |
| ZM221    | 0    | 6    | PB        | SW        |
| ZM238    | 4    | 3    | PB        | CA        |
| ZM292    | 1    | 6    | PL        | CF        |
| M-DONORS |      |      |           |           |
| RW56     | 3    | >15  | PB        | CA        |
| ZM242    | 3    | >15  | PB        | CA        |

D, donor; F, female; M, male; BL, blood; GT, genital tract.
